# Supplementary material for: The toxic effects of electronic cigarette aerosol and cigarette smoke on cardiovascular, gastrointestinal and renal systems in mice
Source: PubMed Central journal article supplement (PMC10390502; doi:10.1038/s41598-023-39201-7), 2023-07-31
Supplement: 41598_2023_39201_MOESM1_ESM.pdf [file 41598_2023_39201_MOESM1_ESM.pdf]

# Supplementary Material

## **The toxic effects of electronic cigarette aerosol and cigarette smoke on cardiovascular, gastrointestinal and renal systems in mice**

Aijing Xu<sup>1</sup>, Kun Duan<sup>3</sup>, Wanchun Yang<sup>1</sup>, Guodong Feng<sup>1</sup>, Zehong Wu<sup>3</sup>, Xingtao Jiang<sup>3</sup>, Min Li<sup>1, 2</sup>, Peiqing Liu<sup>1, 2\*</sup>, Jianwen Chen<sup>1, 2\*</sup>

<sup>1</sup> Department of Pharmacology and Toxicology, School of Pharmaceutical Sciences, Sun Yat-Sen University, Guangzhou 510006, Guangdong, China.

<sup>2</sup> National and Local Joint Engineering Laboratory of Druggability and New Drugs Evaluation, Guangdong Engineering Laboratory of Druggability and New Drug Evaluation, School of Pharmaceutical Sciences, Sun Yat-sen University, Guangzhou 510006, China.

<sup>3</sup> RELX Science Center, Shenzhen RELX Tech. Co., Ltd., Shenzhen 518101, China.

\* Corresponding author

E-mail addresses: chenjwen@mail.sysu.edu.cn; Tel: +86-020-3994-3062

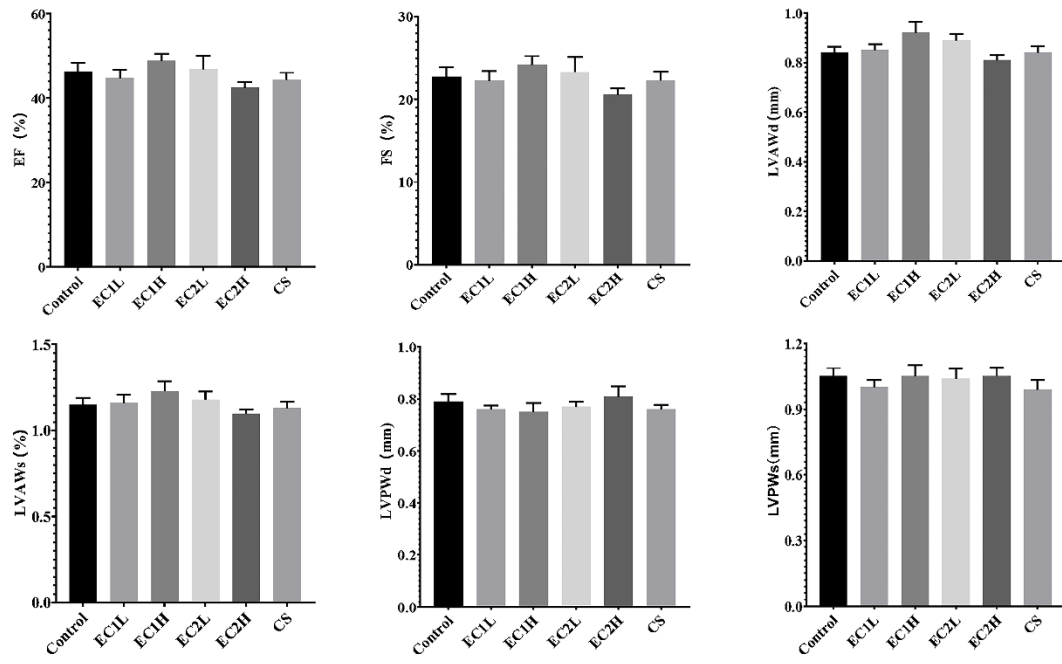

**Figure S1.** Effects of EC and CS on cardiac function in mice (n=7-8) . Data are represented as mean± SEM.

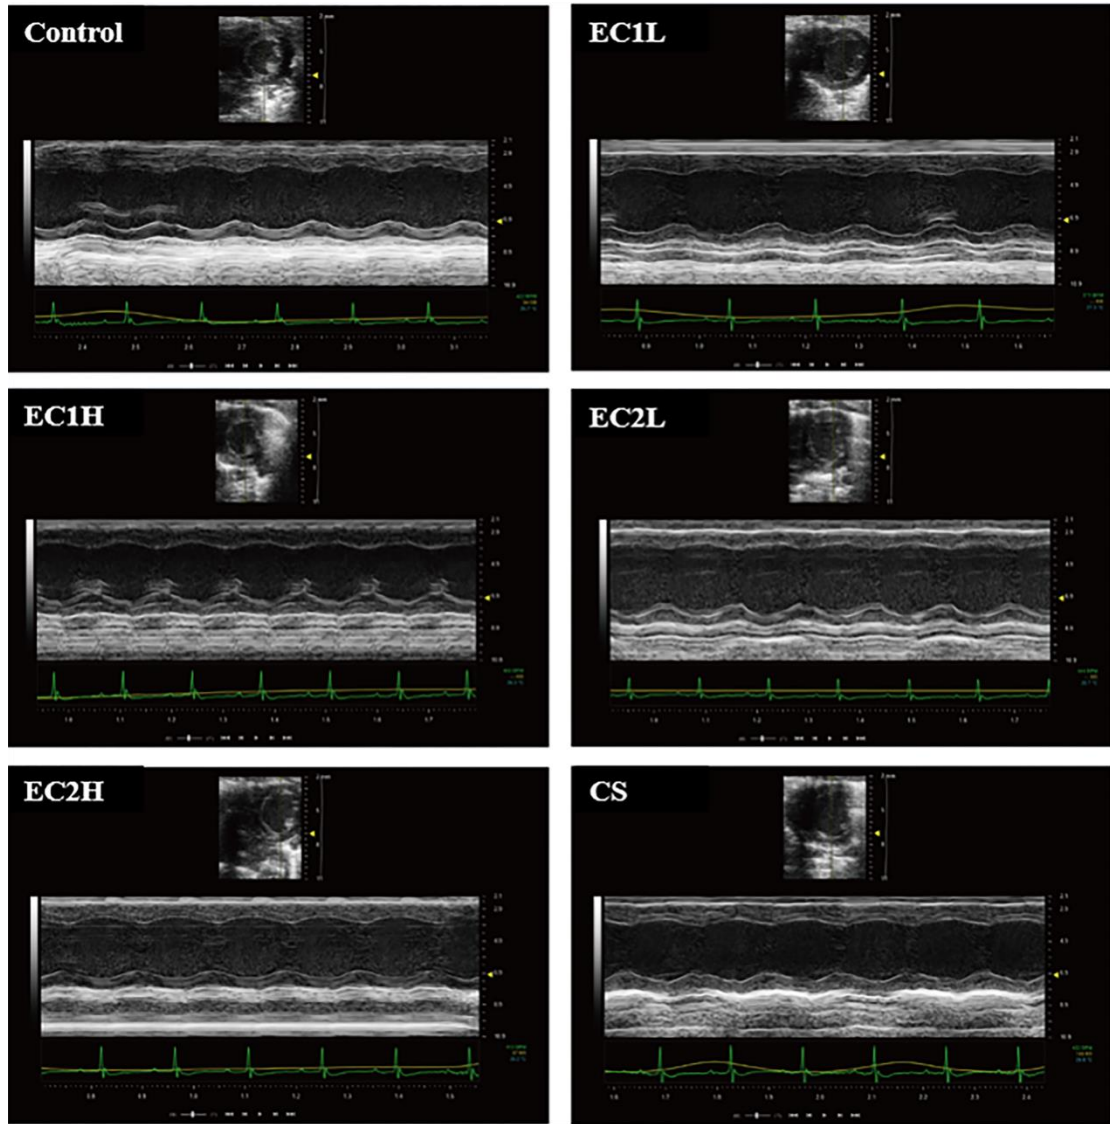

**Figure S2.** Ultra- high resolution ultrasound image of small animal heart.

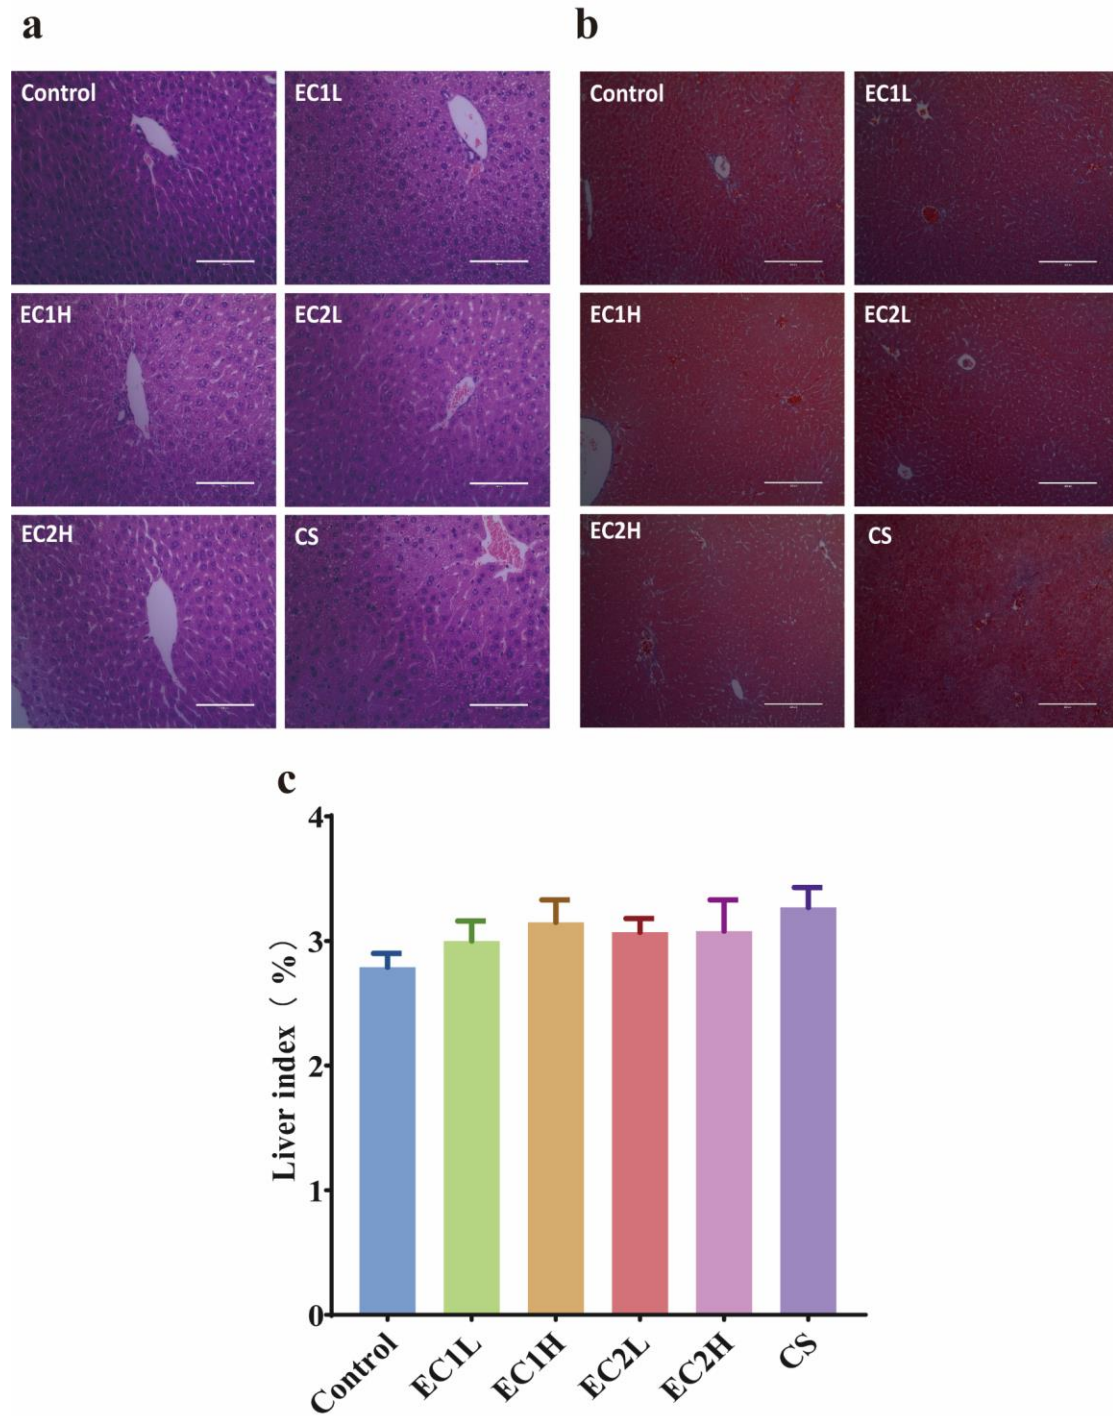

**Figure S3.** Pathological changes of liver in mice. **(a)** (HE,  $\times 400$ ) and **(b)** (Masson,  $\times 200$ ) **(c)** Liver index ( $n=7-8$ ).

## RAW data

**Fig.1a**

|             | <b>Control</b> | <b>EC1L</b>  | <b>EC1H</b>  | <b>EC2L</b>  | <b>EC2H</b>  | <b>CS</b>    |
|-------------|----------------|--------------|--------------|--------------|--------------|--------------|
|             | 95.76          | 87.12        | 91.94        | 95.83        | 96.11        | 79.05        |
|             | 96.26          | 90.56        | 85.86        | 93.06        | 90.26        | 84.17        |
|             | 98.99          | 85.02        | 90.89        | 92.43        | 89.57        | 79.29        |
|             | 90.6           | 90.73        | 96.38        | 94.56        | 93.51        | 80.41        |
|             | 92.84          | 95.29        | 94.03        | 92.61        | 92.61        | 79.3         |
|             | 95.23          | 93.73        | 91.02        | 98.49        | 91.87        | 78.21        |
|             | 98.07          | 94.36        | 85.82        | 90.46        | 89.75        | 85.62        |
|             | 98.06          | 91.43        | 89.87        | 87.76        | 84.29        |              |
| <b>mean</b> | <b>95.73</b>   | <b>91.03</b> | <b>90.73</b> | <b>93.15</b> | <b>91.00</b> | <b>80.86</b> |
| <b>SEM</b>  | <b>1.01</b>    | <b>1.26</b>  | <b>1.29</b>  | <b>1.16</b>  | <b>1.23</b>  | <b>1.08</b>  |

**Fig.1b**

|             | <b>Control</b> | <b>EC1L</b>   | <b>EC1H</b>   | <b>EC2L</b>   | <b>EC2H</b>   | <b>CS</b>     |
|-------------|----------------|---------------|---------------|---------------|---------------|---------------|
|             | 587.04         | 571.55        | 563.77        | 593.84        | 652.74        | 654.73        |
|             | 633.56         | 636.61        | 606.49        | 596.70        | 518.67        | 580.31        |
|             | 592.19         | 658.76        | 643.88        | 655.89        | 663.63        | 626.36        |
|             | 599.54         | 637.68        | 624.32        | 575.47        | 587.56        | 607.01        |
|             | 543.84         | 635.85        | 608.92        | 596.02        | 662.90        | 685.73        |
|             | 573.96         | 548.00        | 658.86        | 604.48        | 583.79        | 635.22        |
|             | 561.24         | 582.55        | 593.32        | 576.84        | 596.25        | 602.29        |
|             | 619.11         | 587.99        | 612.11        | 533.25        | 622.73        |               |
| <b>mean</b> | <b>588.81</b>  | <b>607.37</b> | <b>613.96</b> | <b>591.56</b> | <b>611.03</b> | <b>627.38</b> |
| <b>SEM</b>  | <b>10.4</b>    | <b>14.03</b>  | <b>10.39</b>  | <b>12.13</b>  | <b>17.61</b>  | <b>13.34</b>  |

**Fig.1d**

|             | <b>Control</b> | <b>EC1L</b> | <b>EC1H</b> | <b>EC2L</b> | <b>EC2H</b> | <b>CS</b>   |
|-------------|----------------|-------------|-------------|-------------|-------------|-------------|
|             | 0.47           | 0.55        | 0.44        | 0.56        | 0.51        | 0.55        |
|             | 0.52           | 0.66        | 0.58        | 0.57        | 0.52        | 0.61        |
|             | 0.55           | 0.54        | 0.64        | 0.51        | 0.57        | 0.56        |
|             | 0.56           | 0.45        | 0.55        | 0.59        | 0.47        | 0.55        |
|             | 0.50           | 0.51        | 0.51        | 0.50        | 0.52        | 0.51        |
|             | 0.47           | 0.57        | 0.54        | 0.52        | 0.54        | 0.55        |
|             | 0.49           | 0.52        | 0.56        | 0.49        | 0.56        | 0.56        |
|             | 0.52           | 0.52        | 0.53        | 0.51        | 0.54        |             |
| <b>mean</b> | <b>0.51</b>    | <b>0.54</b> | <b>0.54</b> | <b>0.53</b> | <b>0.53</b> | <b>0.56</b> |
| <b>SEM</b>  | <b>0.01</b>    | <b>0.02</b> | <b>0.02</b> | <b>0.01</b> | <b>0.01</b> | <b>0.01</b> |

**Fig.5a**

|             | <b>Control</b> | <b>EC1L</b> | <b>EC1H</b> | <b>EC2L</b> | <b>EC2H</b> | <b>CS</b>   |
|-------------|----------------|-------------|-------------|-------------|-------------|-------------|
|             | 0              | 0           | 0           | 0           | 0           | 1           |
|             | 0              | 0           | 0           | 0           | 1           | 2           |
|             | 0              | 0           | 0           | 0           | 0           | 1           |
|             | 0              | 0           | 1           | 0           | 0           | 2           |
|             | 0              | 0           | 0           | 0           | 1           | 2           |
|             | 0              | 0           | 1           | 0           | 0           | 1           |
|             | 0              | 1           | 0           | 1           | 0           | 0           |
|             | 0              | 0           | 0           | 0           | 0           |             |
| <b>mean</b> | <b>0.00</b>    | <b>0.13</b> | <b>0.25</b> | <b>0.13</b> | <b>0.25</b> | <b>1.29</b> |
| <b>SEM</b>  | <b>0</b>       | <b>0.13</b> | <b>0.16</b> | <b>0.13</b> | <b>0.16</b> | <b>0.29</b> |

**Fig.6c**

|             | <b>Control</b> | <b>EC1L</b> | <b>EC1H</b> | <b>EC2L</b> | <b>EC2H</b> | <b>CS</b>   |
|-------------|----------------|-------------|-------------|-------------|-------------|-------------|
|             | 0.48           | 0.54        | 0.56        | 0.55        | 0.59        | 0.50        |
|             | 0.50           | 0.47        | 0.53        | 0.54        | 0.51        | 0.50        |
|             | 0.55           | 0.53        | 0.47        | 0.52        | 0.53        | 0.57        |
|             | 0.56           | 0.50        | 0.54        | 0.54        | 0.53        | 0.58        |
|             | 0.39           | 0.46        | 0.55        | 0.49        | 0.58        | 0.71        |
|             | 0.55           | 0.62        | 0.46        | 0.56        | 0.49        | 0.59        |
|             | 0.48           | 0.57        | 0.50        | 0.48        | 0.51        | 0.54        |
|             | 0.44           | 0.52        | 0.54        | 0.52        | 0.54        |             |
| <b>mean</b> | <b>0.49</b>    | <b>0.53</b> | <b>0.52</b> | <b>0.52</b> | <b>0.53</b> | <b>0.57</b> |
| <b>SEM</b>  | <b>0.02</b>    | <b>0.02</b> | <b>0.01</b> | <b>0.01</b> | <b>0.01</b> | <b>0.03</b> |

**Fig.S3 c**

|             | <b>Control</b> | <b>EC1L</b> | <b>EC1H</b> | <b>EC2L</b> | <b>EC2H</b> | <b>CS</b>   |
|-------------|----------------|-------------|-------------|-------------|-------------|-------------|
|             | 2.74           | 3.09        | 2.35        | 3.54        | 2.03        | 3.41        |
|             | 2.86           | 2.62        | 2.77        | 3.19        | 2.68        | 3.97        |
|             | 3.37           | 3.21        | 3.21        | 2.66        | 3.36        | 2.92        |
|             | 2.88           | 2.68        | 3.46        | 3.41        | 3.29        | 2.87        |
|             | 2.23           | 2.70        | 3.90        | 3.15        | 2.49        | 3.41        |
|             | 2.94           | 3.97        | 3.31        | 2.83        | 4.37        | 3.46        |
|             | 2.75           | 2.82        | 3.47        | 2.83        | 3.08        | 2.85        |
|             | 2.58           | 2.88        | 2.72        | 2.94        | 3.33        |             |
| <b>mean</b> | <b>2.79</b>    | <b>3.00</b> | <b>3.15</b> | <b>3.07</b> | <b>3.08</b> | <b>3.27</b> |
| <b>SEM</b>  | <b>0.11</b>    | <b>0.16</b> | <b>0.18</b> | <b>0.11</b> | <b>0.25</b> | <b>0.16</b> |

**Fig.S1**

| <b>FS (%)</b> | <b>Control</b> | <b>EC1L</b>  | <b>EC1H</b>  | <b>EC2L</b>  | <b>EC2H</b>  | <b>CS</b>    |
|---------------|----------------|--------------|--------------|--------------|--------------|--------------|
|               | 15.96          | 19.83        | 22.31        | 25.23        | 21.69        | 20.95        |
|               | 22.74          | 24.37        | 23.47        | 14.06        | 22.25        | 25.47        |
|               | 21.76          | 22.43        | 26.58        | 26.77        | 19.66        | 25.26        |
|               | 22.01          | 22.68        | 21.75        | 22.25        | 18.74        | 17.53        |
|               | 25.33          | 16.60        | 23.57        | 20.41        | 23.08        | 23.29        |
|               | 25.43          | 20.41        | 26.35        | 20.18        | 22.77        | 22.09        |
|               | 27.07          | 27.31        | 20.74        | 30.41        | 18.14        | 21.51        |
|               | 21.26          | 24.48        | 29.10        | 27.23        | 18.20        |              |
| <b>mean</b>   | <b>22.70</b>   | <b>22.26</b> | <b>24.23</b> | <b>23.32</b> | <b>20.57</b> | <b>22.30</b> |
| <b>SEM</b>    | <b>1.21</b>    | <b>1.17</b>  | <b>1.01</b>  | <b>1.82</b>  | <b>0.74</b>  | <b>1.04</b>  |

  

| <b>EF (%)</b> | <b>Control</b> | <b>EC1L</b>  | <b>EC1H</b>  | <b>EC2L</b>  | <b>EC2H</b>  | <b>CS</b>    |
|---------------|----------------|--------------|--------------|--------------|--------------|--------------|
|               | 34.01          | 40.93        | 45.80        | 50.34        | 43.74        | 43.29        |
|               | 46.28          | 48.97        | 47.56        | 30.42        | 45.55        | 50.87        |
|               | 46.42          | 45.86        | 53.03        | 52.84        | 41.03        | 42.16        |
|               | 44.71          | 46.35        | 44.48        | 45.55        | 39.17        | 36.85        |
|               | 50.43          | 35.35        | 47.50        | 41.88        | 46.77        | 44.61        |
|               | 50.70          | 42.17        | 52.44        | 41.66        | 46.75        | 48.36        |
|               | 53.63          | 53.55        | 42.80        | 58.62        | 38.17        | 44.02        |
|               | 43.77          | 44.81        | 56.67        | 53.83        | 38.34        |              |
| <b>mean</b>   | <b>46.24</b>   | <b>44.75</b> | <b>48.79</b> | <b>46.89</b> | <b>42.44</b> | <b>44.31</b> |
| <b>SEM</b>    | <b>2.11</b>    | <b>1.93</b>  | <b>1.69</b>  | <b>3.16</b>  | <b>1.31</b>  | <b>1.7</b>   |

  

| <b>LVAW;d (mm)</b> | <b>Control</b> | <b>EC1L</b> | <b>EC1H</b> | <b>EC2L</b> | <b>EC2H</b> | <b>CS</b>   |
|--------------------|----------------|-------------|-------------|-------------|-------------|-------------|
|                    | 0.83           | 0.73        | 0.95        | 0.97        | 0.74        | 0.93        |
|                    | 0.96           | 0.91        | 1.01        | 0.81        | 0.82        | 0.90        |
|                    | 0.86           | 0.86        | 0.75        | 0.85        | 0.85        | 0.85        |
|                    | 0.85           | 0.93        | 0.74        | 0.94        | 0.88        | 0.70        |
|                    | 0.83           | 0.92        | 0.90        | 0.81        | 0.72        | 0.84        |
|                    | 0.81           | 0.82        | 0.89        | 0.89        | 0.86        | 0.84        |
|                    | 0.86           | 0.78        | 1.10        | 1.00        | 0.77        | 0.86        |
|                    | 0.72           | 0.86        | 1.04        | 0.84        | 0.85        |             |
| <b>mean</b>        | <b>0.84</b>    | <b>0.85</b> | <b>0.92</b> | <b>0.89</b> | <b>0.81</b> | <b>0.84</b> |
| <b>SEM</b>         | <b>0.02</b>    | <b>0.02</b> | <b>0.05</b> | <b>0.03</b> | <b>0.02</b> | <b>0.03</b> |

| LVAW;s (mm) | Control     | EC1L        | EC1H        | EC2L        | EC2H        | CS          |
|-------------|-------------|-------------|-------------|-------------|-------------|-------------|
|             | 1.18        | 1.05        | 1.23        | 1.33        | 1.11        | 1.25        |
|             | 1.26        | 1.22        | 1.26        | 1.04        | 1.08        | 1.13        |
|             | 1.15        | 1.17        | 1.03        | 1.16        | 1.17        | 1.11        |
|             | 1.09        | 1.26        | 1.00        | 1.18        | 1.20        | 0.94        |
|             | 1.15        | 1.26        | 1.34        | 1.03        | 1.07        | 1.16        |
|             | 1.23        | 1.01        | 1.13        | 1.15        | 1.03        | 1.17        |
|             | 1.23        | 0.97        | 1.40        | 1.42        | 1.02        | 1.18        |
|             | 0.91        | 1.33        | 1.43        | 1.16        | 1.10        |             |
| mean        | <b>1.15</b> | <b>1.16</b> | <b>1.23</b> | <b>1.18</b> | <b>1.10</b> | <b>1.13</b> |
| SEM         | <b>0.04</b> | <b>0.05</b> | <b>0.06</b> | <b>0.05</b> | <b>0.02</b> | <b>0.04</b> |

| LVPW;d (mm) | Control     | EC1L        | EC1H        | EC2L        | EC2H        | CS          |
|-------------|-------------|-------------|-------------|-------------|-------------|-------------|
|             | 0.870833    | 0.7425      | 0.870833    | 0.7975      | 0.944167    | 0.7975      |
|             | 0.7425      | 0.779167    | 0.715       | 0.760833    | 0.88        | 0.7975      |
|             | 0.7896      | 0.753333    | 0.678333    | 0.806667    | 0.7975      | 0.7258      |
|             | 0.7425      | 0.77        | 0.751667    | 0.7975      | 0.733333    | 0.678333    |
|             | 0.715       | 0.7425      | 0.66        | 0.7425      | 0.678333    | 0.7402      |
|             | 0.941875    | 0.7         | 0.733333    | 0.834167    | 0.953333    | 0.7947      |
|             | 0.815833    | 0.843333    | 0.669167    | 0.733333    | 0.779167    | 0.788333    |
|             | 0.715       | 0.751667    | 0.916667    | 0.669167    | 0.678333    |             |
| mean        | <b>0.79</b> | <b>0.76</b> | <b>0.75</b> | <b>0.77</b> | <b>0.81</b> | <b>0.76</b> |
| SEM         | <b>0.03</b> | <b>0.01</b> | <b>0.03</b> | <b>0.02</b> | <b>0.04</b> | <b>0.02</b> |

| LVPW;s (mm) | Control     | EC1L        | EC1H        | EC2L        | EC2H        | CS          |
|-------------|-------------|-------------|-------------|-------------|-------------|-------------|
|             | 0.980833    | 0.889167    | 1.310833    | 1.045       | 1.173333    | 1.081667    |
|             | 1.081667    | 1.045       | 0.935       | 0.788333    | 1.164167    | 1.035833    |
|             | 1.05216     | 1.0015      | 0.9625      | 1.2375      | 1.026667    | 0.933333    |
|             | 0.925833    | 0.971667    | 1.081667    | 1.109167    | 0.916667    | 0.843333    |
|             | 1.026667    | 1.118333    | 0.999167    | 1.054167    | 0.9625      | 0.8521      |
|             | 1.189375    | 0.860417    | 0.980833    | 0.980833    | 1.173333    | 1.1508      |
|             | 1.191667    | 1.1275      | 0.925833    | 1.1         | 1.045       | 1.054167    |
|             | 0.916667    | 0.99        | 1.21        | 1.035833    | 0.9075      |             |
| mean        | <b>1.05</b> | <b>1.00</b> | <b>1.05</b> | <b>1.04</b> | <b>1.05</b> | <b>0.99</b> |
| SEM         | <b>0.04</b> | <b>0.03</b> | <b>0.05</b> | <b>0.05</b> | <b>0.04</b> | <b>0.04</b> |
